# Supplementary material for: Microencapsulation system for scalable differentiation of peripheral motor neurons from human induced pluripotent stem cells
Source: Royal Society of Chemistry journal article supplement (doi:10.1039/d5bm00535c), 2025-01-01
Supplement: d5bm00535c1.pdf [file d5bm00535c1.pdf]

Supplementary DATA. The supplementary table presents detailed qPCR data, including gene symbols, cycle threshold (Ct) values, and defined experimental conditions. All results were obtained using a DNA assay kit, ensuring standardized quantification of target genes. Table formatting and labeling have been refined to ensure clarity, consistency, and ease of interpretation across all sample groups and target genes.
